# Supplementary material for: Nanoparticulated Honokiol Mitigates Cisplatin-Induced Chronic Kidney Injury by Maintaining Mitochondria Antioxidant Capacity and Reducing Caspase 3-Associated Cellular Apoptosis
Source: Antioxidants (Basel). 2019 Oct 9;8(10):466. doi: 10.3390/antiox8100466 (PMC6826708; doi:10.3390/antiox8100466)
Supplement: Supplementary file 1 [file antioxidants-08-00466-s001.pdf]

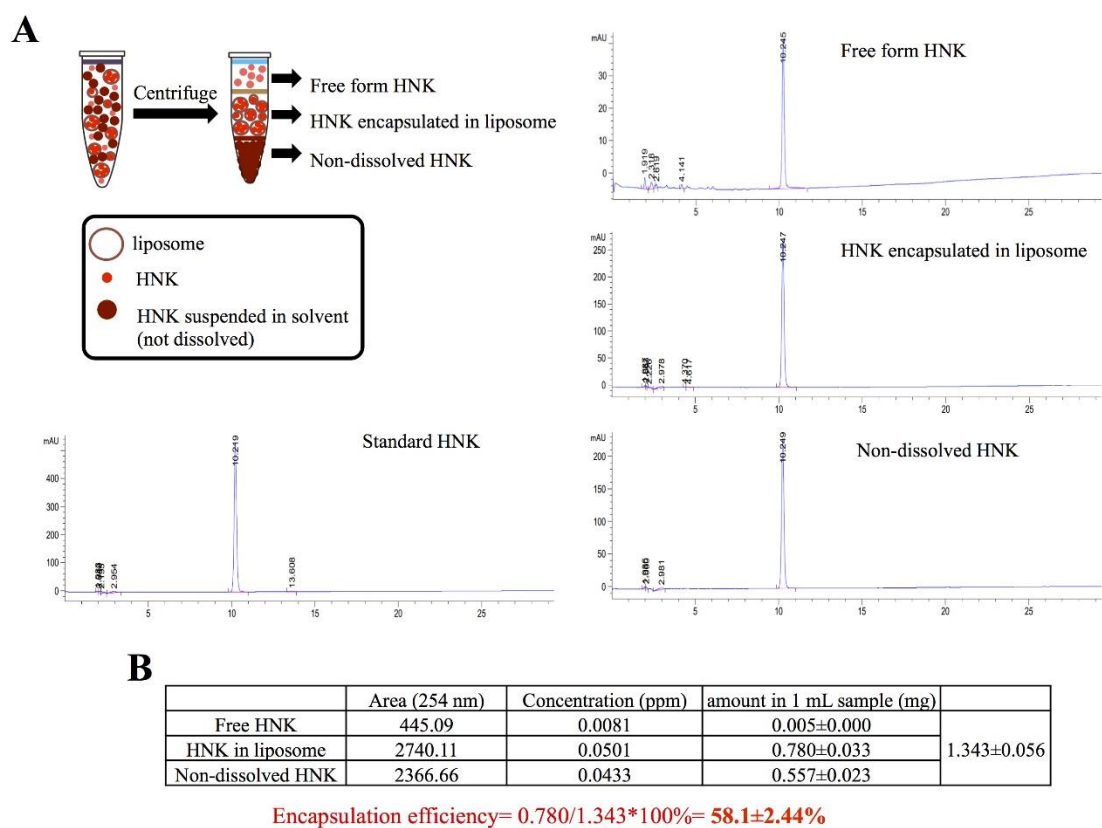

**Figure 1.** Qualitative and quantitative characterizations of liposome-encapsulated honokiol.

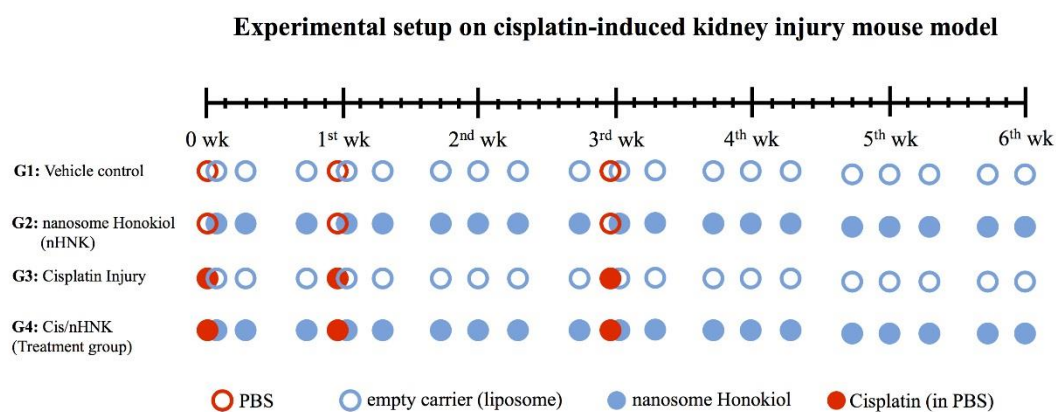

**Figure 2.** Establishment of cisplatin-induced chronic kidney injury model

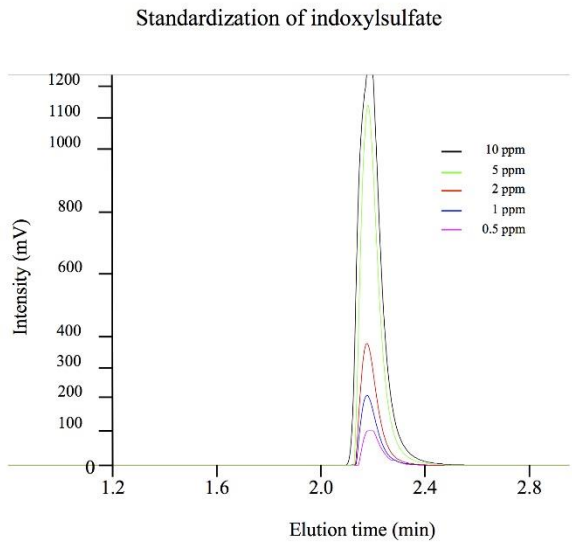

**Figure 3.** Standardization of serum indoxylsulfate detection by high-performance liquid chromatography in kidney tissues

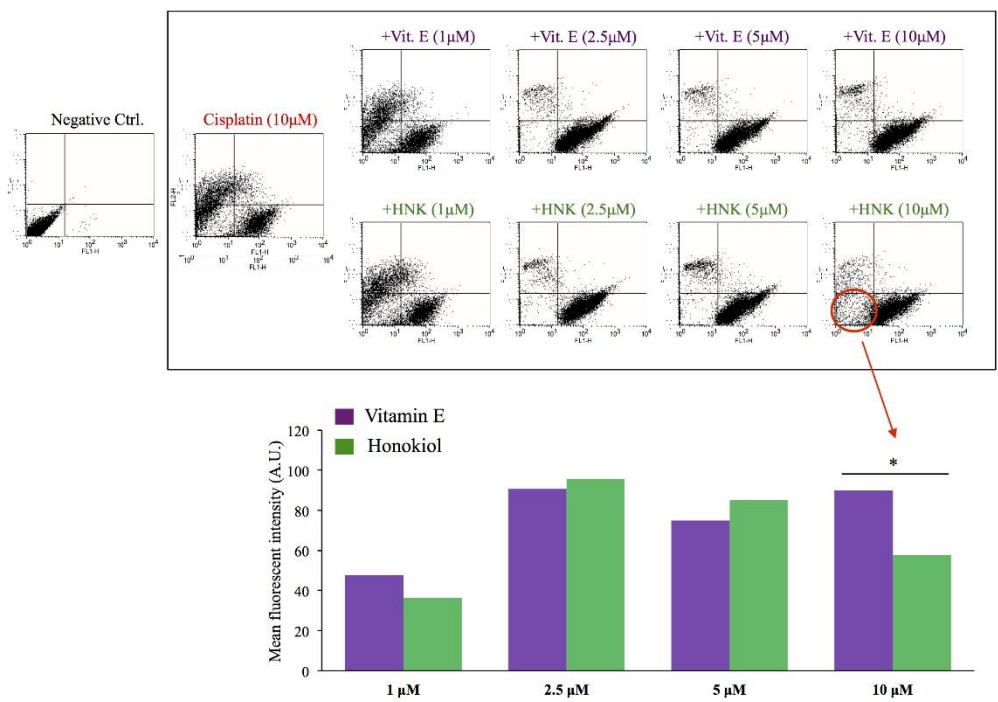

**Figure 4.** Measurement and comparisons on the antioxidation ability between vitamin E and honokiol by flow cytometry using membrane-permeable dye 2', 7'-dichlorofluorescein diacetate (DCFH-DA).
